# Supplementary material for: Circular RNA CDR1as disrupts the p53/MDM2 complex to inhibit Gliomagenesis
Source: PubMed Central journal article supplement (PMC7487905; doi:10.1186/s12943-020-01253-y), 2020-09-07
Supplement: 12943_2020_1253_MOESM2_ESM.pdf [file 12943_2020_1253_MOESM2_ESM.pdf]

A

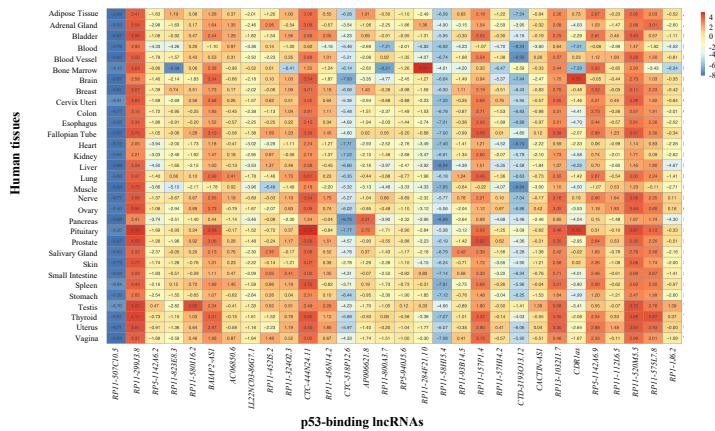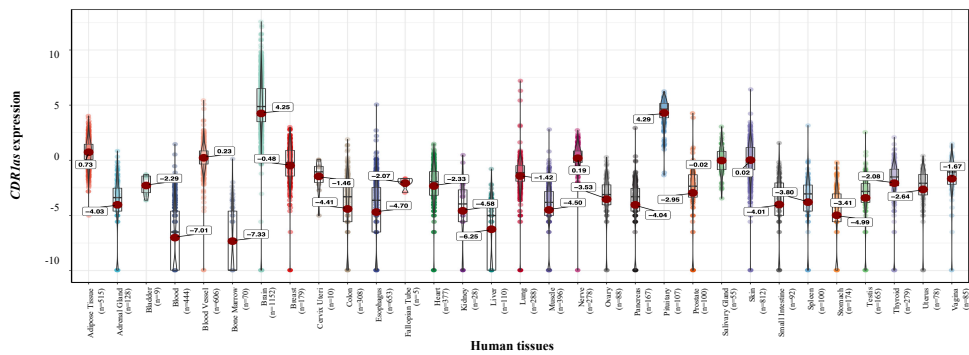

B

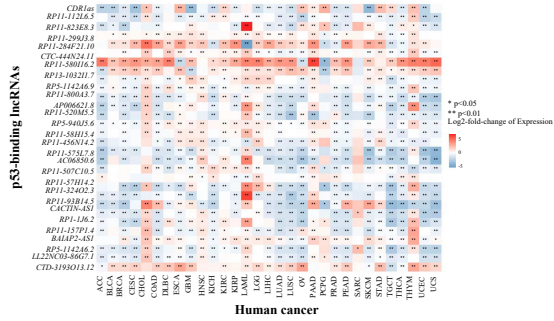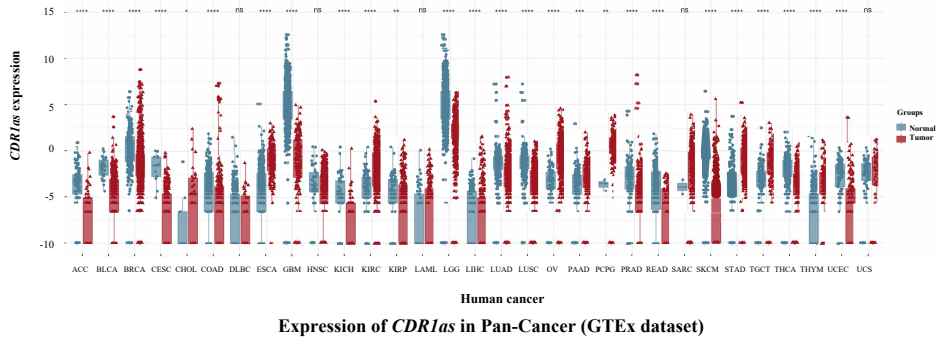

C

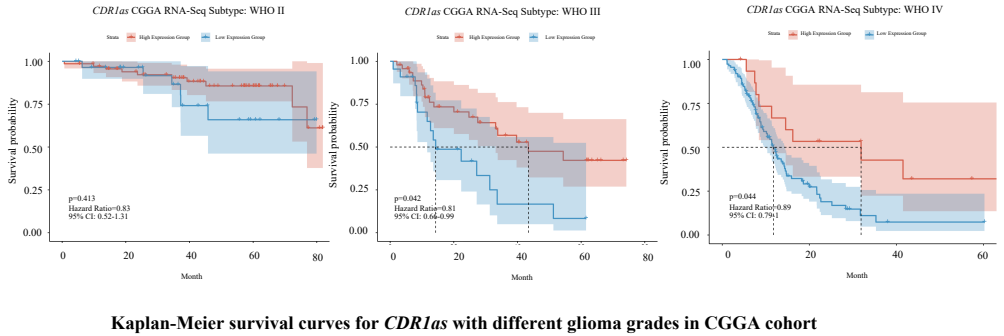

Kaplan-Meier survival curves for *CDR1as* with different glioma grades in CGGA cohort

D

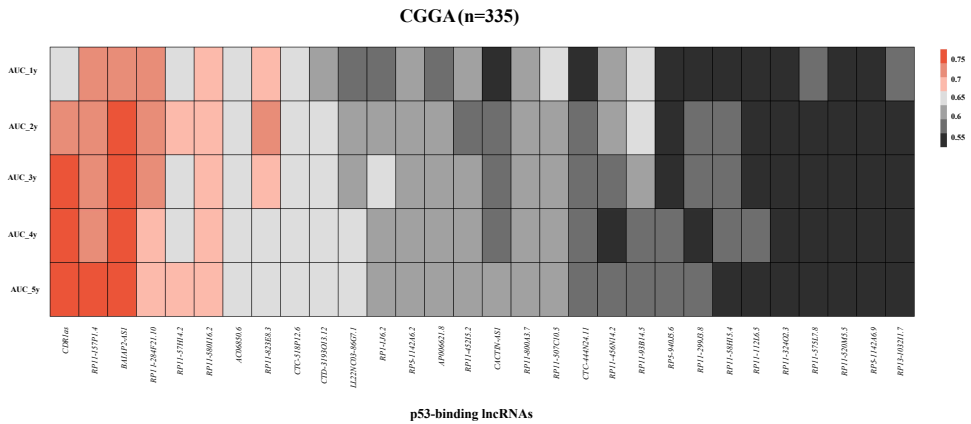

AUC for different durations of survival for p53-binding lncRNAs in CGGA cohort

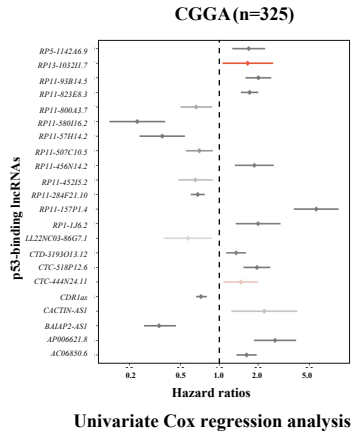

Univariate Cox regression analysis

E

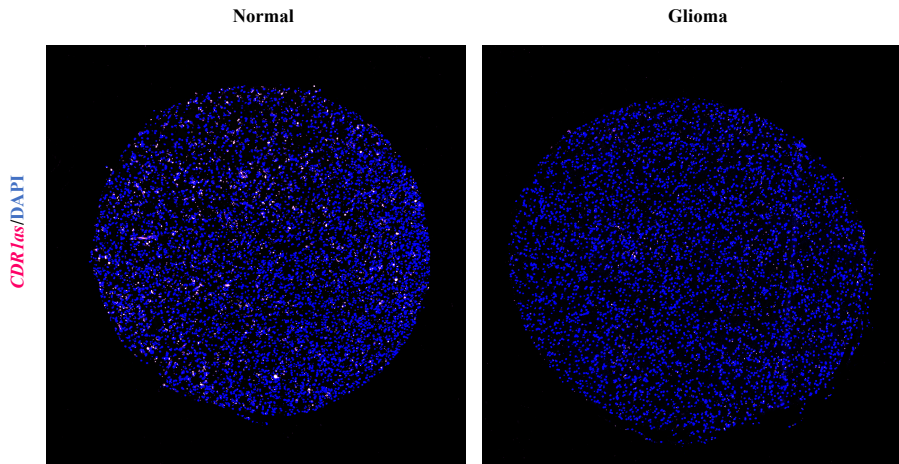

RNA FISH assays for *CDR1as* expression in glioma and normal brain tissues
