# Supplementary material for: Circular RNA CDR1as disrupts the p53/MDM2 complex to inhibit Gliomagenesis
Source: PubMed Central journal article supplement (PMC7487905; doi:10.1186/s12943-020-01253-y), 2020-09-07

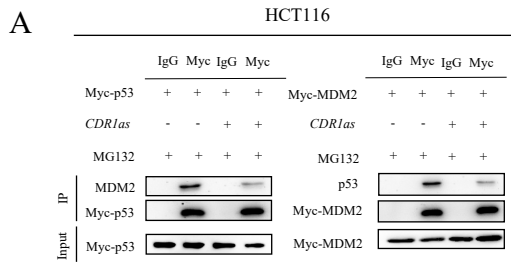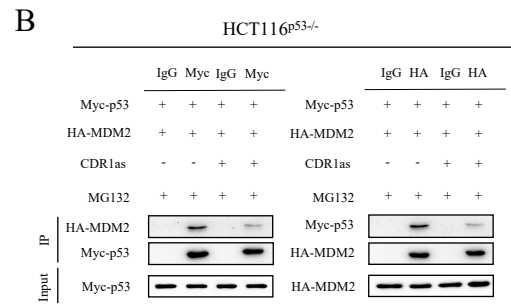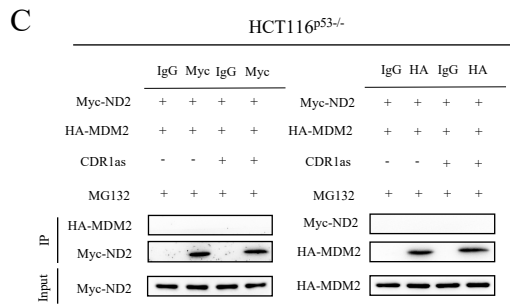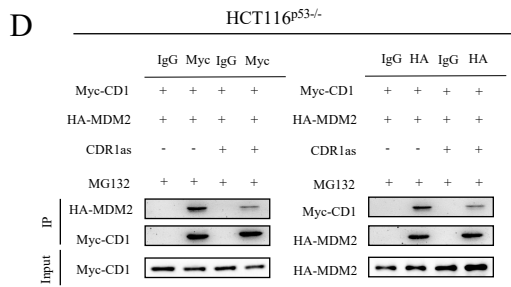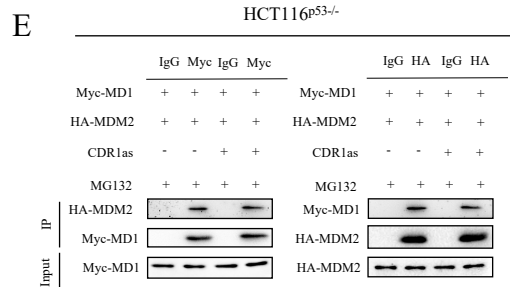

Supplement: 12943_2020_1253_MOESM6_ESM.pdf [file 12943_2020_1253_MOESM6_ESM.pdf]
